# Supplementary material for: Downregulated miRNA-491-3p accelerates colorectal cancer growth by increasing uMtCK expression
Source: PeerJ. 2022 Nov 28;10:e14285. doi: 10.7717/peerj.14285 (PMC9744150; doi:10.7717/peerj.14285)
Supplement: Supplemental Information 4 [file peerj-10-14285-s004.xlsx]

## Sheet: fig3a
Area	Aisle	CT	TM	Type	Gene	The sample name
A01	FAM	16.33	79.5	Unknown	18s	pcDNA-Cont
A02	FAM	16.35	80.5	Unknown	18s	pcDNA-Cont
A03	FAM	16.36	81	Unknown	18s	pcDNA-Cont
A04	FAM	16.43	82	Unknown	18s	pcDNA-Cont
A05	FAM	16.41	78	Unknown	18s	pcDNA-Cont
A06	FAM	16.41	81.5	Unknown	18s	pcDNA-Cont
A07	FAM	16.49	78.5	Unknown	18s	pcDNA-Cont
A08	FAM	16.48	80	Unknown	18s	pcDNA-Cont
A09	FAM	16.49	81.5	Unknown	18s	pcDNA-Cont
A10	FAM	16.55	79.5	Unknown	18s	pcDNA-uMtCK
A11	FAM	16.55	79	Unknown	18s	pcDNA-uMtCK
A12	FAM	16.56	82	Unknown	18s	pcDNA-uMtCK
B01	FAM	16.6	79.5	Unknown	18s	pcDNA-uMtCK
B02	FAM	16.63	81	Unknown	18s	pcDNA-uMtCK
B03	FAM	16.62	78	Unknown	18s	pcDNA-uMtCK
B04	FAM	16.46	81.5	Unknown	18s	pcDNA-uMtCK
B05	FAM	16.47	80	Unknown	18s	pcDNA-uMtCK
B06	FAM	16.45	78	Unknown	18s	pcDNA-uMtCK
B07	FAM	29.64	79	Unknown	uMtCK	pcDNA-Cont
B08	FAM	29.66	81.5	Unknown	uMtCK	pcDNA-Cont
B09	FAM	29.65	80	Unknown	uMtCK	pcDNA-Cont
B10	FAM	29.89	78	Unknown	uMtCK	pcDNA-Cont
B11	FAM	29.89	80.5	Unknown	uMtCK	pcDNA-Cont
B12	FAM	29.87	78.5	Unknown	uMtCK	pcDNA-Cont
C01	FAM	29.98	80	Unknown	uMtCK	pcDNA-Cont
C02	FAM	29.97	82	Unknown	uMtCK	pcDNA-Cont
C03	FAM	29.99	80.5	Unknown	uMtCK	pcDNA-Cont
C04	FAM	27.6	79.5	Unknown	uMtCK	pcDNA-uMtCK
C05	FAM	27.62	81	Unknown	uMtCK	pcDNA-uMtCK
C06	FAM	27.61	81.5	Unknown	uMtCK	pcDNA-uMtCK
C07	FAM	27.54	80.5	Unknown	uMtCK	pcDNA-uMtCK
C08	FAM	27.52	80	Unknown	uMtCK	pcDNA-uMtCK
C09	FAM	27.54	78	Unknown	uMtCK	pcDNA-uMtCK
C10	FAM	27.39	81	Unknown	uMtCK	pcDNA-uMtCK
C11	FAM	27.37	81.5	Unknown	uMtCK	pcDNA-uMtCK
C12	FAM	27.38	79	Unknown	uMtCK	pcDNA-uMtCK

## Sheet: fig3b
pcDNA-Cont		0h	24h	48h	96h
	cell viability	0.17	0.18	0.25	0.34
		0.21	0.22	0.29	0.39
		0.19	0.22	0.27	0.38
	Mean	0.19	0.206667	0.27	0.37
	SD	0.02	0.023094	0.02	0.0264575
pcDNA-uMtCK		0h	24h	48h	96h
	cell viability	0.21	0.22	0.31	0.56
		0.17	0.23	0.33	0.51
		0.2	0.26	0.37	0.53
	Mean	0.193333	0.236667	0.336667	0.533333
	SD	0.0208167	0.0208167	0.0305505	0.0251661

## Sheet: fig3c
Area	Aisle	CT	TM	Type	Gene	The sample name
A01	FAM	14.56	82	Unknown	18s	siCont
A02	FAM	14.55	80.5	Unknown	18s	siCont
A03	FAM	14.55	79.5	Unknown	18s	siCont
A04	FAM	14.63	81	Unknown	18s	siCont
A05	FAM	14.62	81.5	Unknown	18s	siCont
A06	FAM	14.64	80.5	Unknown	18s	siCont
A07	FAM	14.71	80	Unknown	18s	siCont
A08	FAM	14.71	78	Unknown	18s	siCont
A09	FAM	14.73	81	Unknown	18s	siCont
A10	FAM	14.22	81.5	Unknown	18s	siuMtCK
A11	FAM	14.23	78.5	Unknown	18s	siuMtCK
A12	FAM	14.25	80	Unknown	18s	siuMtCK
B01	FAM	14.35	82	Unknown	18s	siuMtCK
B02	FAM	14.36	80.5	Unknown	18s	siuMtCK
B03	FAM	14.35	79	Unknown	18s	siuMtCK
B04	FAM	14.45	79.5	Unknown	18s	siuMtCK
B05	FAM	14.46	78.5	Unknown	18s	siuMtCK
B06	FAM	14.46	78	Unknown	18s	siuMtCK
B07	FAM	28.53	79	Unknown	uMtCK	siCont
B08	FAM	28.52	81	Unknown	uMtCK	siCont
B09	FAM	28.51	82	Unknown	uMtCK	siCont
B10	FAM	28.61	79.5	Unknown	uMtCK	siCont
B11	FAM	28.6	81	Unknown	uMtCK	siCont
B12	FAM	28.6	78	Unknown	uMtCK	siCont
C01	FAM	28.54	81.5	Unknown	uMtCK	siCont
C02	FAM	28.55	80	Unknown	uMtCK	siCont
C03	FAM	28.53	78	Unknown	uMtCK	siCont
C04	FAM	30.02	81	Unknown	uMtCK	siuMtCK
C05	FAM	30.01	80.5	Unknown	uMtCK	siuMtCK
C06	FAM	30.01	82	Unknown	uMtCK	siuMtCK
C07	FAM	30.56	78.5	Unknown	uMtCK	siuMtCK
C08	FAM	30.55	79	Unknown	uMtCK	siuMtCK
C09	FAM	30.54	79.5	Unknown	uMtCK	siuMtCK
C10	FAM	30.47	81	Unknown	uMtCK	siuMtCK
C11	FAM	30.45	81.5	Unknown	uMtCK	siuMtCK
C12	FAM	30.46	80	Unknown	uMtCK	siuMtCK

## Sheet: fig3d
siCont		0h	24h	48h	96h
	cell viability	0.23	0.3	0.39	0.64
		0.27	0.33	0.45	0.58
		0.25	0.36	0.39	0.63
	Mean	0.25	0.33	0.41	0.616667
	SD	0.02	0.03	0.034641	0.0321455
siuMtCK		0h	24h	48h	96h
	cell viability	0.24	0.32	0.38	0.4
		0.29	0.26	0.32	0.48
		0.21	0.29	0.32	0.44
	Mean	0.246667	0.29	0.34	0.44
	SD	0.0404145	0.03	0.034641	0.04
