# Supplementary material for: Downregulated miRNA-491-3p accelerates colorectal cancer growth by increasing uMtCK expression
Source: PeerJ. 2022 Nov 28;10:e14285. doi: 10.7717/peerj.14285 (PMC9744150; doi:10.7717/peerj.14285)
Supplement: Supplemental Information 5 [file peerj-10-14285-s005.xlsx]

## Sheet: fig4b
Control		Vector control	uMtCK-3'UTR	uMtCK-3'UTR-mut
	cell viability	1.04	0.91	0.92
		0.91	1.03	1.07
		1.05	0.9	0.96
	Mean	1	0.946667	0.983333
	SD	0.0781025	0.0723418	0.0776745
miR-491-3p		Vector control	uMtCK-3'UTR	uMtCK-3'UTR-mut
	cell viability	1.08	0.5	0.9
		0.92	0.52	1.06
		1	0.58	0.94
	Mean	1	0.533333	0.966667
	SD	0.08	0.0416333	0.0832666

## Sheet: fig4cd-SW480
	Control	miR-491-3p
uMtCK	0.36	0.17
	0.38	0.2
	0.35	0.23
β-actin读值	0.86	0.81
	0.85	0.82
	0.84	0.83
	0.418605	0.209877
	0.447059	0.243902
	0.416667	0.277108

## Sheet: fig4cd-SW620
	Control	miR-491-3p
uMtCK	0.35	0.21
	0.33	0.25
	0.34	0.25
β-actin读值	0.85	0.82
	0.82	0.83
	0.83	0.81
	0.411765	0.256098
	0.402439	0.301205
	0.409639	0.308642
